1 **No difference in retinal fluorescence after oral curcumin intake in amyloid**  
2 **proven AD cases compared to controls**

3  
4  
5 Jurre den Haan<sup>1</sup>, MD, PhD, Frederique J. Hart de Ruyter<sup>1</sup>, MD, Benjamin Lochocki<sup>2</sup>,  
6 PhD, Maurice A.G.M. Kroon<sup>3</sup>, PharmD, E. Marleen Kemper<sup>3</sup>, PharmD, PhD,  
7 Charlotte E. Teunissen, PhD<sup>4</sup>, Bart van Berckel, MD, PhD<sup>5</sup>, Philip Scheltens, MD,  
8 PhD<sup>1</sup>, Jeroen J. Hoozemans, PhD<sup>6</sup>, Aleid van de Kreeke, MD, PhD<sup>7</sup>, Frank D.  
9 Verbraak, MD, PhD<sup>8</sup>, Johannes F. de Boer, PhD<sup>2\*</sup>, Femke H. Bouwman, MD, PhD<sup>1\*</sup>.

10

11 <sup>1</sup> Amsterdam UMC, location VUmc, Alzheimer Center, Neurology, Amsterdam, The Netherlands,

12 <sup>2</sup> VU Amsterdam, Department of Physics, LaserLaB, The Netherlands

13 <sup>3</sup>Amsterdam UMC, location AMC, Department of Pharmacy and Clinical Pharmacology, Amsterdam,  
14 The Netherlands.

15 <sup>4</sup> Amsterdam UMC, location VUmc, Neurochemistry lab, Department of Clinical Chemistry, Amsterdam  
16 Neuroscience, Amsterdam UMC, Vrije Universiteit Amsterdam, The Netherlands

17 <sup>5</sup> Amsterdam UMC, location VUmc, Department of Nuclear Medicine, Amsterdam, The Netherlands

18 <sup>6</sup> Amsterdam UMC, location VUmc, Department of Pathology, Amsterdam Neuroscience, The  
19 Netherlands

20 <sup>7</sup> Amsterdam UMC, location AMC, Ophthalmology Department Amsterdam, The Netherlands

21 <sup>8</sup> Amsterdam UMC, location VUmc, Ophthalmology Department, Amsterdam, The Netherlands

22 <sup>\*</sup>Equal contribution.

23

24

25

26

27

28

29

30 Corresponding author:

31 Femke Bouwman, MD, PhD

32 Alzheimer center Amsterdam, Department of Neurology

33 Amsterdam UMC

34 Mailbox 7057

35 1007 MB Amsterdam

36 The Netherlands

37 Phone: +31204440685

38 Fax: +31204448529

39 Email: [femke.bouwman@amsterdamumc.nl](mailto:femke.bouwman@amsterdamumc.nl)

40

41

42 **NOTE: This preprint reports new research that has not been certified by peer review and should not be used to guide clinical practice.**

43 **Abstract**

44

45 **INTRODUCTION:**

46 Previous work showed the *in-vivo* presence of retinal amyloid in AD patients using  
47 curcumin. We aimed to replicate these findings in an amyloid biomarker confirmed  
48 cohort.

49

50 **METHODS:**

51 Twenty-six AD patients (age 66 (+9), MMSE $\geq$ 17) and 14 controls (age 71(+12)) used  
52 one of three curcumin formulations: Longvida<sup>®</sup>, Theracurmin<sup>®</sup> and Novasol<sup>®</sup>.  
53 Plasma levels were determined and pre- and post- curcumin retinal fluorescence  
54 scans were visually assessed in all cases and quantitatively assessed in a subset.

55

56 **RESULTS:**

57 Visual assessment showed no difference between AD patients and controls for pre-  
58 and post-curcumin images. This was confirmed by quantitative analyses on a subset.  
59 Mean conjugated plasma curcumin levels were 198.7 nM (Longvida<sup>®</sup>), 576.6 nM  
60 (Theracurmin<sup>®</sup>) and 1605.8 nM (Novasol<sup>®</sup>).

61

62 **DISCUSSION:**

63 We found no difference in retinal fluorescence between amyloid confirmed AD cases  
64 and control participants, using Longvida<sup>®</sup> and two additional curcumin formulations.  
65 Additional replication studies in amyloid confirmed cohorts are needed to assess the  
66 diagnostic value of retinal fluorescence as an AD biomarker.

67

68

## 69 **Background**

70 Alzheimer's disease (AD) research over the last decades enabled clinicians to  
71 diagnose AD not only in the dementia end-stage but also in the prodromal and  
72 preclinical stages using biomarkers for amyloid, tau and neurodegeneration [1, 2]. AD  
73 pathology starts 15-20 years before symptom onset and is reflected by change of  
74 biomarkers in the preclinical stage [1]. This time-interval provides a window of  
75 opportunity for disease modifying drugs to potentially halt disease progression  
76 towards the end stage of AD: dementia [3]. As currently used biomarkers are time  
77 consuming, expensive and/or invasive, non-invasive easily accessible biomarkers are  
78 urgently needed to diagnose AD in the earliest stages, enabling timely selection of  
79 patients for trials and future medication.

80 The retina is an extension of the central nervous system and might provide such a  
81 biomarker. As such the retina is increasingly studied for manifestations of AD as  
82 potential non-invasive AD biomarkers. For example, retinal thinning, changes in  
83 retinal vasculature and peripheral drusen have been described in AD patients [4-6].  
84 More specifically related to AD pathology, three small studies reported visualization  
85 of retinal amyloid beta deposits *in-vivo* using curcumin, a polipotent polyphenol with  
86 fluorescent properties that binds to amyloid in post-mortem brain tissue [7-9]. The  
87 presence of retinal amyloid beta deposits is however not unequivocally proven, since  
88 we and other groups could not confirm amyloid beta deposits in post mortem retinal  
89 tissue [10-14]. Moreover, curcumin is known for its low bioavailability, and while  
90 several commercially available formulations enhancing curcumin plasma levels are  
91 on the market, so far only one formulation (Longvida<sup>®</sup>) has been reported to visualize  
92 retinal amyloid[7].

93 In the current study, we used three different curcumin formulations as labeling  
94 fluorophores in-vivo. Using a targeted fluorescence approach, we aimed to visualize  
95 retinal amyloid in a well-characterized and amyloid biomarker confirmed AD cohort.

96

97

## 98 **Methods**

### 99 *Participants*

100 We enrolled 26 patients with AD (MMSE score  $\geq 17$ ) and 14 controls (MMSE  $\geq 27$ )  
101 from two different cohorts – the Alzheimer Dementia Cohort (ADC) and the EMIF-AD  
102 PreclinAD study. All subjects underwent extensive screening according to a  
103 standardized protocol described elsewhere [15, 16]. All patients fulfilled NIA-AA  
104 criteria of AD with amyloid biomarker confirmation through either CSF amyloid beta<sub>1-</sub>  
105 <sub>42</sub> (A $\beta$ <sub>42</sub>) analysis or amyloid-PET [1]. ADC controls had subjective cognitive decline,  
106 defined as cognitive complaints without objective cognitive impairment on  
107 neuropsychological exam, no signs of neurodegeneration on neuroimaging, and  
108 absence of AD pathology based on CSF biomarkers and/or amyloid-PET. Exclusion  
109 criteria for all participants were ophthalmological conditions interfering with retinal  
110 scan quality, e.g. diabetic retinopathy, glaucoma or moderate/intermediate age  
111 related macular degeneration.. In addition, we excluded subjects with ischemic stroke  
112 and/or mild to severe white matter hyperintensities on MRI, operationalized as a  
113 Fazekas score  $> 2$ . We excluded two AD patients; one because of problems with eye  
114 fixation due to visuoperceptive dysfunction and one because of participation in a drug  
115 trial with disease modifying drugs. We excluded two controls; one due to problems  
116 finishing the scan protocol because of dry eyes and one was found to have  
117 glaucoma. Three AD patients were lost to follow up. This study was designed and

118 conducted according to the Declaration of Helsinki and the study protocol was  
119 approved by the Ethical Committee of the VU University Medical Center. All patients  
120 gave their written informed consent in the presence of their caregiver.

121

#### 122 *Amyloid biomarker assessment*

123 Between 2016 and 2018, CSF concentrations of A $\beta$ <sub>42</sub>, total tau, and tau  
124 phosphorylated at threonine 181 (pTau<sub>181</sub>) were measured using Innotech ELISAs  
125 (Fujirebio, Ghent, Belgium). Between 2018 and 2020, these CSF biomarkers were  
126 assessed using Elecsys A $\beta$ <sub>1-42</sub> CSF, Elecsys total-tau CSF, and Elecsys pTau<sub>181</sub>  
127 CSF electrochemiluminescence immunoassays (Roche Diagnostics, Basel,  
128 Switzerland). For comparability Innotech CSF values were converted using previously  
129 published conversion formulas [17]. A pTau/ A $\beta$ <sub>42</sub>-ratio $\geq$ 0.020 was considered an AD  
130 profile [18].

131 Amyloid-PET scanning was performed with either <sup>18</sup>F-Florbetaben (NeuraCeq), <sup>18</sup>F-  
132 Florbetapir (Amyvid) or <sup>18</sup>F-Flutemetamol (Vizamyl) tracers [19-21]. An experienced  
133 nuclear physician (BvB) who completed training for all radiotracers visually assessed  
134 images of amyloid-PET scans as positive or negative.

135

#### 136 *Ophthalmological assessment*

137 Subjects underwent the following general eye examination: best corrected visual  
138 acuity (VA), intraocular pressure (IOP) using non-contact tonometry, and slit-lamp  
139 examination of the anterior and posterior segment, followed by administration of  
140 tropicamide 0.5% to dilate the pupil for optimal retinal imaging. An experienced  
141 ophthalmologist (FDV) interpreted all examinations.

142

143 *Heidelberg HRA SLO imaging*

144 Retinal fluorescence imaging was performed with a Heidelberg Engineering  
145 Spectralis Spectral Domain Scanning Laser Ophthalmoscope, at a 486nm  
146 wavelength (blue autofluorescence) laser source to excite fluorescence, in  
147 combination with a long-pass 500 filter (high transmission in 498-760nm and 800-  
148 835nm). Optical resolution was 12  $\mu\text{m}$  with a 55° lens, and 6  $\mu\text{m}$  with a 30° lens. For  
149 each final image an average of 50 frames was used with a sensitivity >90.

150

151 *Curcumin administration and timing of fluorescence imaging*

152 Three different oral formulations of curcumin were used:

153 1. Longvida® Solid-Lipid Curcumin Particle (Verdure Sciences®), was given in a  
154 dosage of 4000 mg per day for 10 consecutive days to 14 AD patients and 12  
155 controls [7]. Here we used a 30° lens to acquire images in six regions of interest  
156 (ROI) (central macula, superior, temporal, inferior, superior-temporal and inferior-  
157 temporal) at baseline and 2-4 hours after the 10th day of curcumin intake (Figure 1A-  
158 B).

159 2. Theracurmin® (Theracurmin; Theravalues, Tokyo, Japan), was given in a dosage  
160 of 180 mg for 5 consecutive days to 7 AD patients and 2 controls [22, 23]. Here we  
161 acquired images using a 30° lens in three ROI's (central macula, optic nerve head  
162 (ONH) and temporal) at four different time points: i) at baseline, ii) after four days of  
163 curcumin intake, iii) 1 hour after the fifth dose, and iv) 2 hours after the fifth dose  
164 (Figure 1 A-B).

165 3. Novasol® (AQUANOVA AG, Darmstadt, Germany), was given in a dosage of 300  
166 mg for 4 consecutive days and a final dose of 500 mg on day 5 to 5 AD patients [24,  
167 25]. With Novasol we acquired images using a 55° lens in six ROI's (central macula,

168 superior, temporal, inferior, superior-temporal and inferior-temporal) at baseline and 2  
169 hours after the fifth dose (Figure 1A-B).

170

### 171 *Retinal fluorescence image analysis*

172 Baseline and post-curcumin-administration images were assessed both visually and  
173 quantitatively. Visual assessment was performed by an experienced ophthalmologist,  
174 masked for diagnosis and curcumin treatment (FDV). Baseline and post-curcumin-  
175 administration images of AD patients were compared for the Novasol cohort and also  
176 between AD and control subjects for the Theracurmin and Longvida cohort. To  
177 support the visual assessment, we used the Longvida<sup>®</sup> cohort for quantitative  
178 analysis, allowing comparison to previous publications using Longvida<sup>®</sup> as curcumin  
179 derivative. Images of the right eye with sufficient image quality (scans that were out  
180 of focus, had extensive shading or extreme low/high contrast hampering co-  
181 registration were excluded) were assessed for quantitative analysis (Figure 1C).

182 Retinal fluorescence imaging yielded 8-bit grayscale images sized 1536 x 1566 or  
183 768 x 798 pixels with a resolution of 6 or 12  $\mu\text{m}$  respectively per pixel. The non-  
184 normalized, uncompressed images were compared between time points using  
185 MATLAB 2020b (MathWorks). An image pair of two time points of similar ROI's were  
186 cropped to a size of 1430 x 1430 or 715 x 715 pixels to remove the manufacturer  
187 logo and blurry edges. In the case any image pair contained high resolution images  
188 (1430 x 1430) the images were down-sampled to match the size of 715 x 715 pixels.  
189 Afterwards, both images were flat-field corrected to compensate for any illumination  
190 and shading effect. A registration algorithm (feature-based registration (SURF:  
191 Speeded-Up Robust Features) with affine transformation, allowing for rotation) was  
192 used to register matched images [26]. If an automatic match was not obtained, the

193 software interrupted and allowed for manual picking of identical points of interest in  
194 both images and creating a registration match based on the user's input (using the  
195 same registration algorithm). Registered images were cropped to a size of 512 x 512  
196 pixels, ensuring that both images overlapped within the imaged field of view.  
197 Brightness histograms of both images were obtained and matched (using a cubic  
198 polynomial) to the histogram of the baseline image, resulting in images with similar  
199 contrast and overall brightness. We defined focal retinal hyperfluorescence, by  
200 selecting areas of  $\geq 4$  adjacent pixels that represented the 10% highest pixel value in  
201 the post-curcumin image. These hyperfluorescence spots were labeled, and their  
202 area and brightness measured. The same properties were measured in the baseline  
203 image, using the exact same spots (as identified in the post-curcumin image).  
204 Afterwards, the brightness difference between each hyperfluorescence spot was  
205 calculated.

206

#### 207 *Curcuminoids plasma level analysis*

208 Blood was drawn in heparinized tubes that were directly kept in aluminum foil on ice,  
209 to avoid degradation by light and temperature. Within 30 minutes, plasma and serum  
210 were separated and plasma was stored at minus 80°C in the Amsterdam UMC  
211 Biobank. High Performance Liquid Chromatography-Tandem Mass Spectroscopy  
212 (HPLC-MS-MS) analysis was performed to measure different curcuminoids:  
213 curcumin, demethoxycurcumin, bisdemethoxycurcumin and tetrahydrocurcumin.  
214 Each sample was treated, in duplicates, with and without  $\beta$ -glucuronidase after which  
215 unconjugated and conjugated curcuminoids were quantified. Treatment with  $\beta$ -  
216 glucuronidase hydrolyzes the conjugated curcuminoids leading to an increase in  
217 unconjugated curcuminoids, whereas untreated samples were quantified on



218 unconjugated curcumin at that point of time. Our validated method of analysis can be  
219 described, in short, as follows: Liquid-liquid extraction with Tert Butyl Methyl Ether  
220 (TBME) was used to extract the compounds from the plasma [27]. The HPLC-MS/MS  
221 system consisted of an Ultimate 3000 autosampler and pump, both of Dionex,  
222 connected to a degasser from LC Packings. The autosampler, with a 100  $\mu$ L sample  
223 loop, was coupled to an Sciex API4000 mass spectrometer. A total of 50  $\mu$ L sample  
224 was injected after which separation of the analytes was performed with an Agilent  
225 column 2.1x100mm packed with material of Zorbax Extend 3.5  $\mu$ m C-18. The  
226 flowrate was 0.200 $\mu$ L/min and the dual gradient mobile phase consisted of A: ultra-  
227 purified H<sub>2</sub>O with 0.1% formic acid and B: MeOH 100%. The applied gradient profile  
228 started at 50:50 A:B and increased linear to 95% B in 3.0 minutes. During 6 minutes  
229 a 5:95 A:B level is continued, after which it returned in 0.2 minutes to 50:50.  
230 Afterwards the system was equilibrated during 6 minutes at the starting level.  
231 Throughout the liquid-liquid extraction and HPLC-MS/MS the potential influence of  
232 light brought back to a minimum by working in a dark environment. Each analytical  
233 run included a set of freshly prepared calibration samples containing all compounds  
234 in the validated range of 2 nM to 400 nM. Each compound was validated with its own  
235 deuterated internal standard.

236

### 237 *Statistical analysis*

238 SPSS version 26.0 (IBM, Armonk, NY, USA) was used to assess group differences in  
239 demographics, curcumin data and quantitative retinal fluorescence. Chi squared test  
240 was used for dichotomous variables, independent sample T-test was used for  
241 continuous variables that were normally distributed and Mann Whitney U Test was  
242 used for non-normal distributed variables. Quantitative comparison of focal retinal

243 hyperfluorescence between AD patients and controls was assessed by calculating  
244 the number of focal retinal hyperfluorescent pixels defined as a value in the top 10%  
245 value range at baseline and after curcumin, for all retinal regions of the right eye.  
246 Between group differences were assessed using a Mann Whitney U test.  
247 Significance level for all tests was set at 0.05.

248

## 249 **Results**

250 Group demographics of AD and control cases are shown in table 1, and  
251 supplemental table 1 shows data for each individual participant. The control group  
252 comprised more female participants. No differences were found for age between AD  
253 and control group. As expected, and by design, we found significant group  
254 differences for MMSE as well as CSF and amyloid-PET biomarkers. Table 2A shows  
255 the demographics of the sub group used for the quantitative analysis. No statistical  
256 group differences in age and sex were found.

257

### 258 *Qualitative and quantitative retinal fluorescence analysis*

259 No scans were excluded for the qualitative analysis. The qualitative assessment of  
260 images pre- and post-curcumin intake by an experienced ophthalmologist (FDV)  
261 masked for the clinical diagnosis did not show differences in focal hyperfluorescence  
262 in the ROI's, for either AD patients (Longvida<sup>®</sup>, Theracurmin<sup>®</sup> and Novasol<sup>®</sup>) or  
263 controls (Longvida<sup>®</sup> and Theracurmin<sup>®</sup>)(Figure 2 and supplemental Figures 1 and 2).  
264 The Longvida<sup>®</sup> cohort was used for quantitative analysis. For the quantitative  
265 analysis one out of 12 control cases (case #10, see Supplemental Table 1) was  
266 excluded, as our algorithms were unable to find a good registration between time  
267 points. This applied to a total of 24 regions of a total of 10 patients, while the other

268 regions (n=132) could be included in the analysis. All 14 AD cases that used  
269 Longvida® were included in the quantitative analysis. While we did find an overall  
270 increased fluorescence after curcumin intake (data not shown), no differences were  
271 found between diagnostic groups in the number of spots with increased or decreased  
272 fluorescence after curcumin intake for all ROIs (all p-values>0.3) ( Table 2B).

273

#### 274 *Curcuminoids plasma level analysis*

275 HPLC-MS/MS analysis of plasma samples showed detectable levels of free curcumin  
276 in blood around the detection level (2 nM) after Longvida®, Theracurmin® or Novasol®  
277 intake in all 40 subjects, however there were no significant differences between  
278 groups. After treating the samples with  $\beta$ -glucuronidase, catalyzing the separation of  
279 curcumin from glucuronide and sulfate conjugates, curcumin levels were higher  
280 (Table 3). The total mean of curcuminoids was 156.2 nM ( $\pm$ 169.9) after Longvida®,  
281 576.6 nM ( $\pm$ 211.1) after Theracurmin® and 1605.8 nM ( $\pm$ 524.6 nM) after Novasol®  
282 (Figure 3). There were no differences in plasma levels between diagnostic groups (p  
283 >0.3, data not shown).

284

## 285 **Discussion**

286 In this study we aimed to discriminate AD patients from controls with a targeted  
287 fluorescence approach of the retina using curcumin as fluorophore in a well-  
288 characterized AD biomarker confirmed cohort. Using three different curcumin  
289 formulations, we did not find differences in focal retinal hyperfluorescence before or  
290 after curcumin intake between diagnostic groups, despite an observed overall  
291 increase in retinal fluorescence after curcumin intake.

292 Our negative findings may be explained by a low intensity of the fluorescent signal  
293 resulting from (amyloid-bound) curcumin, insufficient binding of unconjugated  
294 curcumin to retinal amyloid, absence of retinal amyloid (in this subset of patients) or  
295 methodological limitations of our scanning and analysis methods.  
296  
297 Fluorescence of curcumin largely overlaps with autofluorescence of the retina. This  
298 might therefore mask subtle signals of curcumin fluorescence hypothesized to be the  
299 result of retinal amyloid (plaque) pathology, reported to be approximately 5-20 $\mu$ m in  
300 size [7]. At present no data is available describing the magnitude of fluorescent signal  
301 that can be expected from retinal amyloid relative to retinal autofluorescence. On  
302 visual inspection we could identify a certain number of hyperfluorescent spots (Figure  
303 3, zoom-ins), however there was no difference between AD patients and controls in  
304 these spots, either in size or intensity, neither at baseline, nor after curcumin intake.  
305 To increase sensitivity for weak retinal fluorescent signal possibly overlooked by  
306 visual inspection, we performed a quantitative analysis on a subset of participants (14  
307 AD, 11 controls) who received Longvida confirming findings of the visual inspection.  
308  
309 The absence of a fluorescent signal after curcumin intake could also be explained by  
310 insufficient curcumin binding to retinal amyloid due to low plasma levels of  
311 unconjugated curcumin. After deconjugation using  $\beta$ -glucuronidase we observed  
312 high blood levels of total curcumin, in line with previous studies [22, 24]. In contrast,  
313 Koronyo *et al.* found high levels of unconjugated curcumin (400nM) without using  $\beta$ -  
314 glucuronidase [7]. This could be attributed to their different analysis methods: 1.  
315 wider/broader calibration settings. 2. internal standards without deuterated forms and  
316 validated in mouse. 3. acidification instead of freezing to stabilize samples .

317 Nevertheless, conjugated forms of curcumin are known to bind to amyloid as well  
318 following ex-vivo application to post-mortem brain sections [28]. And penetration of  
319 curcumin in the retina is suggested by our quantitative analysis where a general  
320 increase in fluorescence was observed after curcumin intake (data not shown),  
321 implying that curcumin with the capacity to bind fibrillar amyloid reached the retina.  
322 Despite 3-4 times higher plasma levels of curcumin conjugates using Theracurmin®  
323 and Novasol® compared to Longvida® in this study, we found no difference in focal  
324 retinal hyperfluorescence between AD patients and controls.

325

326 The lack of between-group differences in our study could also be explained by  
327 absence of amyloid in the retina. The presence of (fibrillar) amyloid in the human  
328 retina is not unequivocally proven, as three labs showed positive staining with 6E10  
329 and 12F4 antibodies interpreted as presence of retinal amyloid plaques in post-  
330 mortem retinas, while others were unable to replicate these findings [7, 10, 12, 13,  
331 29, 30]. Methodological heterogeneity in post-mortem study methods might account  
332 for these discrepancies. Replication studies and harmonization of study methods are  
333 needed to overcome these discrepancies before the presence of retinal amyloid in  
334 AD can undoubtedly be confirmed. This is one of the key goals of 'The Eye as a  
335 Biomarker for AD' Personal Interest Area of the Alzheimer's Association.

336

337 Three previous studies showed hyperfluorescence in AD cases after curcumin intake  
338 [7-9]. While these studies were of similar small sample size, AD biomarker  
339 confirmation was lacking, which is essential when relating retinal changes to AD,  
340 since other structures may cause changes in fluorescence as well. For example,  
341 retinal drusen, associated with macular degeneration, contain amyloid and other age-

342 related deposits [31, 32]. This may account for the positive findings in Koronyo's  
343 study where AD patients had a mean age of 76 years compared to 53 years in  
344 controls [7]. More work is needed to discriminate normal aging from pathological  
345 neurodegenerative changes in the retina underlying the observed changes in retinal  
346 fluorescence.

347

348 There are some limitations of this study, potentially explaining the negative findings.  
349 First, our scan timing might have been suboptimal for measuring curcumin bound to  
350 retinal amyloid resulting in impaired sensitivity. The optimal time point to measure  
351 retinal fluorescence is still to be determined. We based our scan timing on previously  
352 published pharmacokinetic curves of systemically available curcumin representing  
353 assumed peak levels of systemic curcumin, as has been shown to yield signal before  
354 [7, 22-25]. Second, the quantitative analysis could not be applied on the full cohort  
355 because of variation in imaging protocols. Also the fluorescent signal itself, is directly  
356 affected by illumination differences within images and between time points. These  
357 small alterations in scan quality may affect the co-registration of baseline and follow  
358 up scans and the signal itself. We applied several algorithms correcting for  
359 differences in illumination and scan quality. We are open to sharing our raw data,  
360 enabling application of other algorithms.

361

362 In conclusion, we found no differences in focal retinal hyperfluorescence between AD  
363 patients and controls pre- and post-curcumin, using Longvida<sup>®</sup>, a curcumin  
364 formulation previously used for this purpose. As we could not replicate previous  
365 findings with similar methods in our amyloid biomarker-confirmed cohort, we question  
366 whether focal retinal hyperfluorescence represents retinal amyloid, or rather age-

367 related changes. Based on our analysis, retinal hyperfluorescence imaging using  
368 oral curcumin as labeling fluorophore is currently not ready for use as AD biomarker.  
369

## 370 References

- 371 1. Jack, C.R., Jr., et al., *NIA-AA Research Framework: Toward a biological*  
372 *definition of Alzheimer's disease*. *Alzheimers Dement*, 2018. **14**(4): p. 535-  
373 562.
- 374 2. Sperling, R.A., et al., *Toward defining the preclinical stages of Alzheimer's*  
375 *disease: recommendations from the National Institute on Aging-Alzheimer's*  
376 *Association workgroups on diagnostic guidelines for Alzheimer's disease*.  
377 *Alzheimers Dement*, 2011. **7**(3): p. 280-92.
- 378 3. Scheltens, P., et al., *Alzheimer's disease*. *Lancet*, 2021. **397**(10284): p. 1577-  
379 1590.
- 380 4. Alber, J., et al., *Developing retinal biomarkers for the earliest stages of*  
381 *Alzheimer's disease: What we know, what we don't, and how to move forward*.  
382 *Alzheimers Dement*, 2020. **16**(1): p. 229-243.
- 383 5. Gupta, V.B., et al., *Retinal changes in Alzheimer's disease- integrated*  
384 *prospects of imaging, functional and molecular advances*. *Prog Retin Eye Res*,  
385 2021. **82**: p. 100899.
- 386 6. Snyder, P.J., et al., *Retinal imaging in Alzheimer's and neurodegenerative*  
387 *diseases*. *Alzheimers Dement*, 2021. **17**(1): p. 103-111.
- 388 7. Koronyo, Y., et al., *Retinal amyloid pathology and proof-of-concept imaging*  
389 *trial in Alzheimer's disease*. *JCI Insight*, 2017. **2**(16).
- 390 8. Tadokoro, K., et al., *Retinal Amyloid Imaging for Screening Alzheimer's*  
391 *Disease*. *J Alzheimers Dis*, 2021.
- 392 9. Ngolab, J., et al., *Feasibility study for detection of retinal amyloid in clinical*  
393 *trials: The Anti-Amyloid Treatment in Asymptomatic Alzheimer's Disease (A4)*  
394 *trial*. *Alzheimers Dement (Amst)*, 2021. **13**(1): p. e12199.
- 395 10. den Haan, J., et al., *Amyloid-beta and phosphorylated tau in post-mortem*  
396 *Alzheimer's disease retinas*. *Acta Neuropathol Commun*, 2018. **6**(1): p. 147.
- 397 11. Jiang, J., et al., *Amyloid Plaques in Retina for Diagnosis in Alzheimer's*  
398 *Patients: a Meta-Analysis*. *Front Aging Neurosci*, 2016. **8**: p. 267.
- 399 12. Williams, E.A., et al., *Absence of Alzheimer Disease Neuropathologic*  
400 *Changes in Eyes of Subjects With Alzheimer Disease*. *J Neuropathol Exp*  
401 *Neurol*, 2017. **76**(5): p. 376-383.
- 402 13. Ho, C.Y., et al., *Beta-amyloid, phospho-tau and alpha-synuclein deposits*  
403 *similar to those in the brain are not identified in the eyes of Alzheimer's and*  
404 *Parkinson's disease patients*. *Brain Pathol*, 2014. **24**(1): p. 25-32.
- 405 14. Schon, C., et al., *Long-term in vivo imaging of fibrillar tau in the retina of*  
406 *P301S transgenic mice*. *PLoS One*, 2012. **7**(12): p. e53547.
- 407 15. Konijnenberg, E., et al., *The EMIF-AD PreclinAD study: study design and*  
408 *baseline cohort overview*. *Alzheimers Res Ther*, 2018. **10**(1): p. 75.
- 409 16. van der Flier, W.M. and P. Scheltens, *Amsterdam Dementia Cohort:*  
410 *Performing Research to Optimize Care*. *J Alzheimers Dis*, 2018. **62**(3): p.  
411 1091-1111.
- 412 17. Willemse, E.A.J., et al., *Diagnostic performance of Elecsys immunoassays for*  
413 *cerebrospinal fluid Alzheimer's disease biomarkers in a nonacademic,*  
414 *multicenter memory clinic cohort: The ABIDE project*. *Alzheimers Dement*  
415 *(Amst)*, 2018. **10**: p. 563-572.
- 416 18. Willemse, E.A.J., et al., *Comparing CSF amyloid-beta biomarker ratios for two*  
417 *automated immunoassays, Elecsys and Lumipulse, with amyloid PET status*.  
418 *Alzheimers Dement (Amst)*, 2021. **13**(1): p. e12182.



- 419 19. Barthel, H., et al., *Cerebral amyloid- $\beta$  PET with florbetaben (18F) in patients*  
420 *with Alzheimer's disease and healthy controls: a multicentre phase 2*  
421 *diagnostic study*. *Lancet Neurol*, 2011. **10**(5): p. 424-35.
- 422 20. Clark, C.M., et al., *Use of florbetapir-PET for imaging beta-amyloid pathology*.  
423 *JAMA*, 2011. **305**(3): p. 275-83.
- 424 21. Curtis, C., et al., *Phase 3 trial of flutemetamol labeled with radioactive fluorine*  
425 *18 imaging and neuritic plaque density*. *JAMA Neurol*, 2015. **72**(3): p. 287-94.
- 426 22. Kanai, M., et al., *A phase I study investigating the safety and*  
427 *pharmacokinetics of highly bioavailable curcumin (Theracurmin) in cancer*  
428 *patients*. *Cancer Chemother Pharmacol*, 2013. **71**(6): p. 1521-30.
- 429 23. Sasaki, H., et al., *Innovative preparation of curcumin for improved oral*  
430 *bioavailability*. *Biol Pharm Bull*, 2011. **34**(5): p. 660-5.
- 431 24. Schiborr, C., et al., *The oral bioavailability of curcumin from micronized*  
432 *powder and liquid micelles is significantly increased in healthy humans and*  
433 *differs between sexes*. *Mol Nutr Food Res*, 2014. **58**(3): p. 516-27.
- 434 25. Kocher, A., et al., *Highly bioavailable micellar curcuminoids accumulate in*  
435 *blood, are safe and do not reduce blood lipids and inflammation markers in*  
436 *moderately hyperlipidemic individuals*. *Mol Nutr Food Res*, 2016. **60**(7): p.  
437 1555-63.
- 438 26. Bay, H., T. Tuytelaars, and L. Van Gool. *SURF: Speeded Up Robust Features*.  
439 *in Computer Vision – ECCV 2006*. 2006. Berlin, Heidelberg: Springer Berlin  
440 Heidelberg.
- 441 27. Kroon, M.A.G.M.v.L., H.W.M.; Swart, E.L. Kemper, E. Marleen; van Tellingem,  
442 Olaf, A *Validated Hplc-Ms/Ms Method for Simultaneously Analyzing*  
443 *Curcuminoids, Tetrahydrocurcumin and Piperine in Human Plasma, Urine or*  
444 *Feces*. Available at SSRN: <https://ssrn.com/abstract=4077493> or  
445 <http://dx.doi.org/10.2139/ssrn.4077493>. SSRN, 2022.
- 446 28. den Haan, J., et al., *Different curcumin forms selectively bind fibrillar amyloid*  
447 *beta in post mortem Alzheimer's disease brains: Implications for in-vivo*  
448 *diagnostics*. *Acta Neuropathol Commun*, 2018. **6**(1): p. 75.
- 449 29. Grimaldi, A., et al., *Neuroinflammatory Processes, A1 Astrocyte Activation and*  
450 *Protein Aggregation in the Retina of Alzheimer's Disease Patients, Possible*  
451 *Biomarkers for Early Diagnosis*. *Front Neurosci*, 2019. **13**: p. 925.
- 452 30. Tsai, Y., et al., *Ocular changes in TgF344-AD rat model of Alzheimer's*  
453 *disease*. *Investigative ophthalmology & visual science*, 2014. **55**(1): p. 523-  
454 534.
- 455 31. Luibl, V., et al., *Drusen deposits associated with aging and age-related*  
456 *macular degeneration contain nonfibrillar amyloid oligomers*. *J Clin Invest*,  
457 2006. **116**(2): p. 378-85.
- 458 32. Bergen, A.A., et al., *On the origin of proteins in human drusen: The meet,*  
459 *greet and stick hypothesis*. *Prog Retin Eye Res*, 2019. **70**: p. 55-84.

461

462 **Authors' contributions**

| <b>Author</b>             | <b>Contributions</b>                                                                                                                  |
|---------------------------|---------------------------------------------------------------------------------------------------------------------------------------|
| Jurre den Haan            | Literature search, study design, data collection, data analysis, data interpretation, figures, writing-original draft. Verified data. |
| Frederique Hart de Ruyter | Data collection, data analysis, data interpretation, writing-review and editing                                                       |
| Benjamin Lochocki         | Image analysis, quantitative data analysis, data interpretation, writing-review and editing                                           |
| Maurice A.G.M. Kroon      | Data collection plasma analysis, data analysis, data interpretation, writing-original draft                                           |
| Marleen E. Kemper         | Methodology plasma analysis, writing-review and editing, supervision                                                                  |
| Charlotte E. Teunissen    | Biomarker data interpretation, writing-review and editing                                                                             |
| Bart van Berckel          | Biomarker data interpretation, writing-review and editing                                                                             |
| Philip Scheltens          | Funding acquisition, writing-review and editing                                                                                       |
| Jeroen J. Hoozemans       | Data interpretation, writing-review and editing                                                                                       |
| Aleid Kreeke              | Data collection                                                                                                                       |
| Frank D. Verbraak         | Methodology, study design, image data collection, data analysis, data interpretation, writing-review&editing. Verified data.          |
| Johannes F. de Boer       | Funding acquisition, methodology, study design, data interpretation, writing-review and editing. Verified data.                       |
| Femke H. Bouwman          | Funding acquisition, study design, data analysis, data interpretation, writing-original draft. Verified data.                         |

463

464

465

466 **Conflicts of interest**

467 Research of CT is supported by the European Commission (Marie Curie International  
468 Training Network, grant agreement No 860197 (MIRIADE), and JPND), Health  
469 Holland, the Dutch Research Council (ZonMW), Alzheimer Drug Discovery  
470 Foundation, The Selfridges Group Foundation, Alzheimer Netherlands, Alzheimer  
471 Association. CT is recipients of ABOARD, which is a public-private partnership  
472 receiving funding from ZonMW (#73305095007) and Health~Holland, Topsector Life  
473 Sciences & Health (PPP-allowance; #LSHM20106). More than 30 partners  
474 participate in ABOARD. ABOARD also receives funding from Edwin Bouw Fonds and  
475 Gieskes-Strijbisfonds. CT has a collaboration contract with ADx Neurosciences,  
476 Quanterix and Eli Lilly, performed contract research or received grants from AC-  
477 Immune, Axon Neurosciences, Biogen, Brainstorm Therapeutics, Celgene, EIP  
478 Pharma, Eisai, PeopleBio, Roche, Toyama, Vivoryon. FB has a collaboration  
479 contract with Biogen, Optina Dx and Roche. Payments are made to the institution of  
480 VUMC. FB is committee member of EAN and chairs the atypical AD PIA and the Eye  
481 as biomarker for AD PIA of ISTAART. PS is chair steering committee in NOVARTIS,  
482 member DSMB GENENTECH, global PI phase s! study AC IMMUNE, member  
483 advisory board AXON NEUROSCIENCE, global PI phase 2B study EIP PHARMA, PI  
484 phase 2B study COGRX, member advisory board GEMVAX, COGNOPTIX and  
485 CORTEXZYME, member strategic innovation committee GREEN VALLEY, PI global  
486 phase 2B study Vivoryon, PI global phase 2A study TOYAMA / FUJI FILM, PI global  
487 phase 1A study IONIS, personal fees from Life Science Partners Amsterdam,  
488 outside the submitted work. JB is supported for the current study by NWO  
489 (Foundation for scientific research in the Netherlands, similar to NIH and NSF) and  
490 Co-financing by Heidelberg engineering as part of the competitive research proposal,

491 administered by the funding agency. Both these fundings are paid to institution.  
492 Besides this study JB received past 36 months research grants from Heidelberg, TKI,  
493 TNO, LSHM paid to institution. Personal fees from royalties through former employer,  
494 Massachussets general Hospital, for IP that has been licensed to Terumo,  
495 Heidelberg engineering and Spectrawave as well as fees for expert witness for a UK  
496 based law firm. He is program committee member for a number of conferences,  
497 unpaid. JdH, FH, MK, MK, BB, JH, AK, FV report no conflict of interest

498

#### 499 **Acknowledgements/Funding**

500 We gratefully acknowledge financial support from Stichting Alzheimercentrum VUMC,  
501 Alzheimer Nederland, the Dutch Technology Foundation STW (grant number 13935),  
502 part of the Netherlands Organization for Scientific Research (NWO), and which is  
503 partly funded by the Ministry of Economic Affairs, ISAO (grant number 14518).

504

#### 505 **Data availability**

506 Raw imaging and clinical data is available upon request

507

#### 508 **Key Words**

509 Biomarker, retina, curcumin, amyloid, Alzheimer's disease

510

511 **Tables**

512 **Table 1. Demographics**

|                                                         | <b>Alzheimer's<br/>disease</b><br><i>n</i> = 26 | <b>Controls</b><br><i>n</i> = 14 | p-value           |
|---------------------------------------------------------|-------------------------------------------------|----------------------------------|-------------------|
| <b>Sex (F/M)</b>                                        | 10/16                                           | 10/4                             | .047 <sup>a</sup> |
| <b>Age, mean (SD)</b>                                   | 67 (9)                                          | 71 (12)                          | .177 <sup>b</sup> |
| <b>MMSE, median (IQR)</b>                               | 24 (21-26)                                      | 29 (29-30)                       | .000 <sup>c</sup> |
| <b>CSF A<math>\beta</math>, median (IQR)</b>            | 541 (466-744)                                   | 1328 (982-1551)                  | .002 <sup>c</sup> |
| <b>CSF Tau, median (IQR)</b>                            | 320 (242-472)                                   | 208 (123-322)                    | .060 <sup>c</sup> |
| <b>CSF pTau, median (IQR)</b>                           | 34 (23-44)                                      | 19 (9-30)                        | .035 <sup>c</sup> |
| <b>CSF biomarker profile<br/>(positive/negative)</b>    | 20/0                                            | 3*/2                             | .033 <sup>a</sup> |
| <b>Amyloid-PET (visual read:<br/>positive/negative)</b> | 17/0                                            | 0/13                             | .000 <sup>a</sup> |

513

514 CSF data (presented as pg/ml) was available in 20 AD cases and 5 controls.

515 Amyloid-PET data (visual read) was available in 17 AD cases and 13 controls. <sup>a</sup>Chi

516 squared test, <sup>b</sup>Independent sample T-test, <sup>c</sup>Mann Whitney-U test. \*3 controls had a

517 borderline positive biomarker profile, with a negative amyloid-PET. Abbreviations: SD

518 = standard deviation; MMSE = mini mental state exam; IQR = interquartile range;

519 pTau = phosphorylated tau; CSF = cerebral spinal fluid.

520

521 **Table 2**  
522 **A) Demographics Longvida® Subgroup Quantitative analysis**

|                                                   | <b>AD</b><br>n = 14 | <b>CN</b><br>n = 11 | p-value             |
|---------------------------------------------------|---------------------|---------------------|---------------------|
| Sex (F/M)                                         | 6/8                 | 7/4                 | 0.302 <sup>a</sup>  |
| Age, mean (SD)                                    | 71(9)               | 73(11)              | 0.405 <sup>b</sup>  |
| MMSE, median (IQR)                                | 24(19-30)           | 29(27-30)           | <0.001 <sup>c</sup> |
| CSF A $\beta$ , median (IQR)                      | 560(322-805)        | 1198(641-1498)      | 0.048 <sup>c</sup>  |
| CSF Tau, median (IQR)                             | 295(108-551)        | 247(136-364)        | 0.683 <sup>c</sup>  |
| CSF pTau, median (IQR)                            | 31(11-33)           | 22(11-33)           | 0.461 <sup>c</sup>  |
| Amyloid-PET (visual read):<br>(positive/negative) | 7/0                 | 0/11                | <0.001 <sup>a</sup> |

523

524 **B) Quantitative analysis**  
525

| <b>Number of increased spots</b> | <b>AD</b> |      | <b>CN</b> |      | p-value |
|----------------------------------|-----------|------|-----------|------|---------|
|                                  | Mean      | SD   | Mean      | SD   |         |
| Macula                           | 29.5      | 23.4 | 46.5      | 51.7 | 0.748   |
| Temporal                         | 40.5      | 28.2 | 47.8      | 45.3 | 0.809   |
| Inferior                         | 52.6      | 62.0 | 37.9      | 46.1 | 0.705   |
| Inferior-Temporal                | 33.3      | 22.0 | 28.0      | 28.9 | 0.403   |
| Superior                         | 39.1      | 47.4 | 29.2      | 25.2 | 0.905   |
| Superior-Temporal                | 44.4      | 35.6 | 44.6      | 36.7 | 1.000   |

526

527

| <b>Number of decreased spots</b> | <b>AD</b> |      | <b>CN</b> |      | p-value |
|----------------------------------|-----------|------|-----------|------|---------|
|                                  | Mean      | SD   | Mean      | SD   |         |
| Macula                           | 3.8       | 6.6  | 8.3       | 17.4 | 0.949   |
| Temporal                         | 8.9       | 12.3 | 8.9       | 16.1 | 0.647   |
| Inferior                         | 8.8       | 15.0 | 6.7       | 13.2 | 0.918   |
| Inferior-Temporal                | 5.2       | 9.8  | 4.7       | 6.0  | 0.926   |
| Superior                         | 6.3       | 7.9  | 3.9       | 5.4  | 0.497   |
| Superior-Temporal                | 11.2      | 11.0 | 9.3       | 8.4  | 0.896   |

528

529 A) CSF data (presented as pg/ml) was available in 8 AD cases and 4 controls.  
530 Amyloid-PET data (visual read) was available in 7 AD cases and 12 controls. aChi  
531 squared test, bIndependent sample T-test, cMann Whitney-U test. \*3 controls had a  
532 borderline positive biomarker profile, with a negative amyloid-PET. Abbreviations: AD  
533 = Alzheimer's disease, CN =Controls, SD = standard deviation; MMSE = mini mental  
534 state exam; IQR = interquartile range; pTau = phosphorylated tau; CSF = cerebral  
535 spinal fluid.

536 B) Results of quantitative analyses of images obtained with 30-degree lens showing  
537 the number of spots with and increased or decreased pixel value after Longvida®  
538 curcumin intake compared to baseline in all retinal regions for 14 AD and 12 control  
539 participants. Data is presented as mean and standard deviations. Group comparisons  
540 were made using a Mann Whitney U Test.

541  
542

543 **Table 3. Curcuminoids plasma levels**

|                      | Longvida <sup>®</sup> | Theracurmin <sup>®</sup> | Novasol <sup>®</sup> |
|----------------------|-----------------------|--------------------------|----------------------|
| Curcumin             | 75.1 (70.2)           | 321.80 (146.1)           | 1108.40 (503.3)      |
| Demethoxycurcumin    | 55 (62.5)             | 19.49 (9.7)              | 58.72 (28.6)         |
| Bisdemethoxycurcumin | 13.7 (12.1)           | 0.66 (0.3)               | 3.23 (2.4)           |
| Tetrahydrocurcumin   | 43.6 (44.9)           | 234.70 (95.5)            | 435.4 (73.8)         |
| Total curcuminoids   | 156.2(169.6)          | 576.6 (211.1)            | 1605.8 (524.6)       |

544  
545 Plasma levels (mean  $\pm$ SD) of different curcuminoids (curcumin, demethoxycurcumin,  
546 bisdemethoxycurcumin and tetrahydrocurcumin) and total curcuminoids after  $\beta$ -  
547 glucuronidase treatment in nanomolar (nM). Time points for serum level  
548 measurement after the start of curcumin intake were 10 days for Longvida<sup>®</sup> and 5  
549 days for Theracurmin<sup>®</sup> and Novasol<sup>®</sup>.

550



551 **Figures**

552

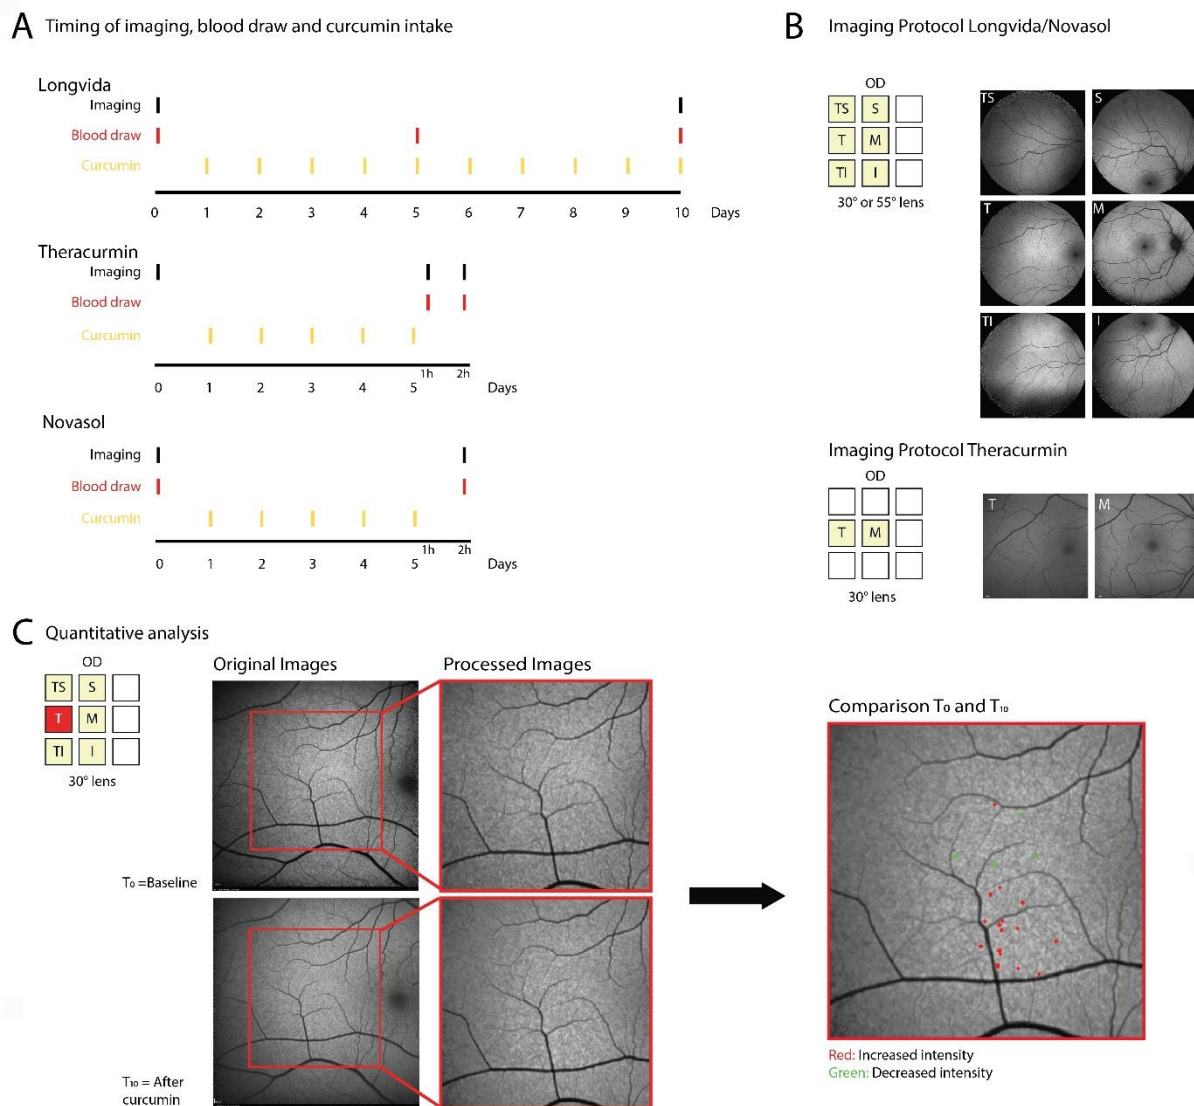

553

554

555 **Figure 1. Visual representation of study protocol**

556 A. Timing of imaging, blood draw and curcumin intake of cohort 1 (Longvida<sup>®</sup>, 4000  
 557 mg for 10 days), cohort 2 (Theracurmin<sup>®</sup>, 180 mg for 5 days) and cohort 3 (Novasol<sup>®</sup>,  
 558 300 mg for 4 days, 500 mg for 1 day). B. Imaging protocol of cohort 1, 2 and 3. C.  
 559 Quantitative analysis.

560

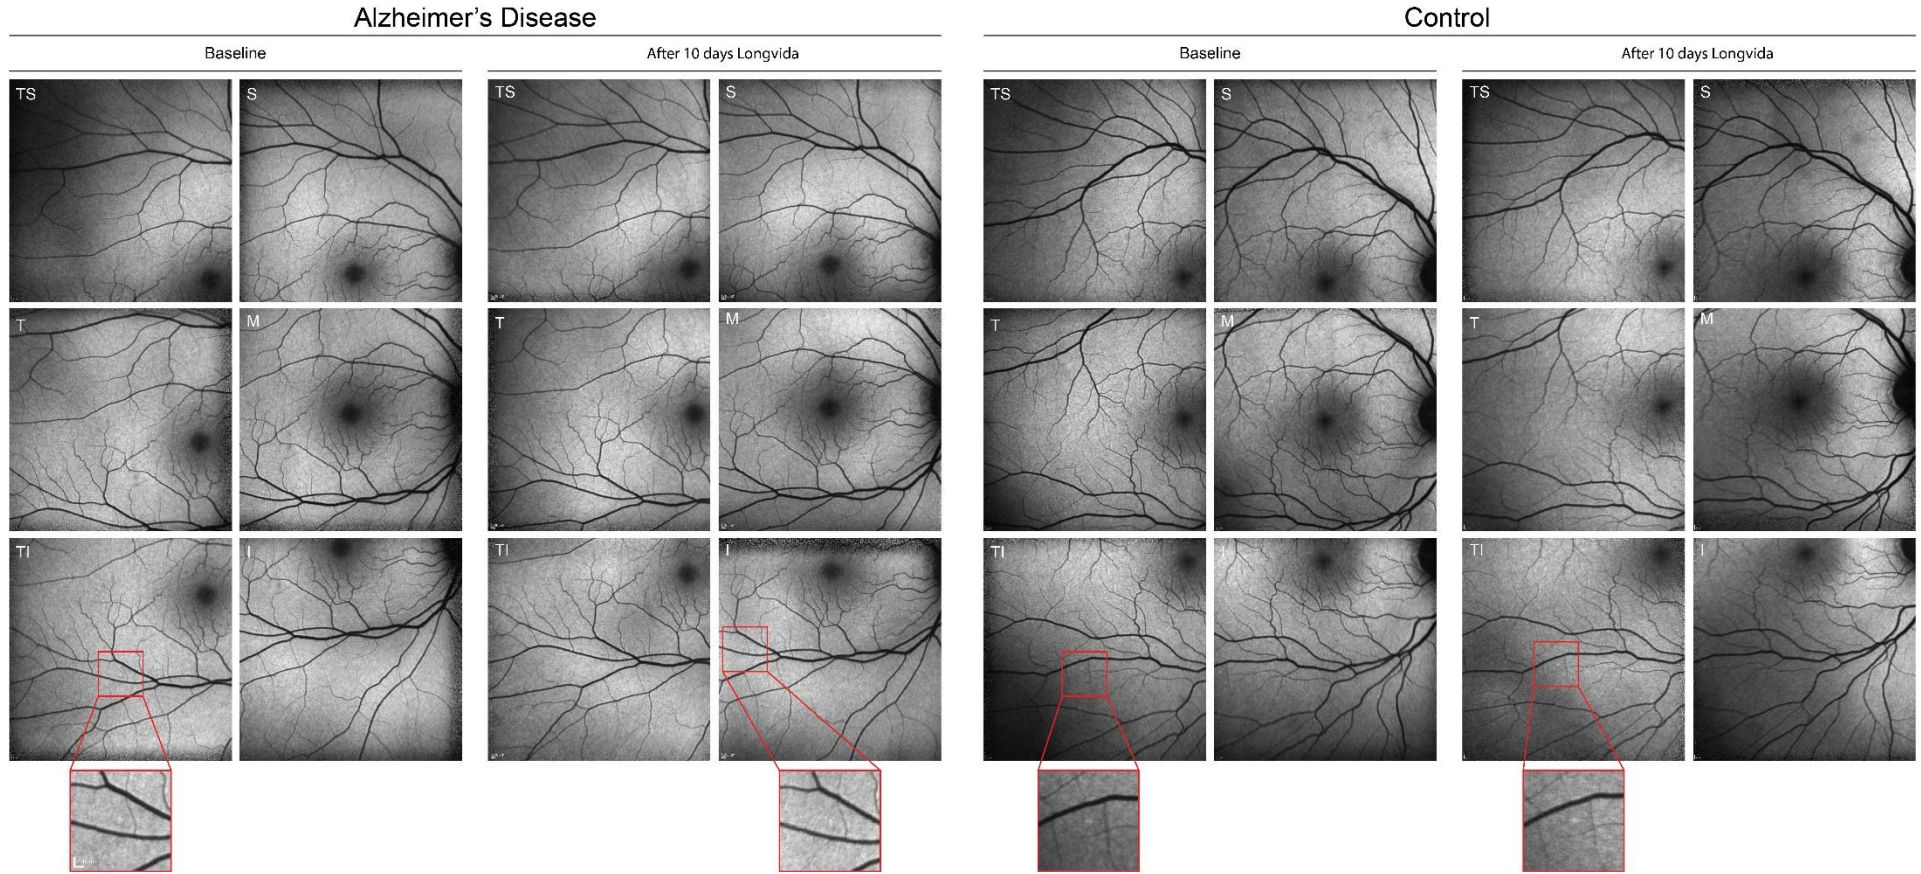

561

562 **Figure 2. Pre- and post-curcumin retinal fluorescence images for AD and control participants using Longvida®**

563 Pre-and post-curcumin retinal fluorescence images using blue auto fluorescence ( $\lambda=486\text{nm}$ ) in 6 retinal regions in a representative  
 564 AD patient and control. Magnifications show incidental focal hyperfluorescence, both on baseline and after curcumin in AD and  
 565 control participants. Abbreviations: TS= temporal-superior, S= superior, T= temporal, M= macula, TI= temporal-inferior, I= inferior.

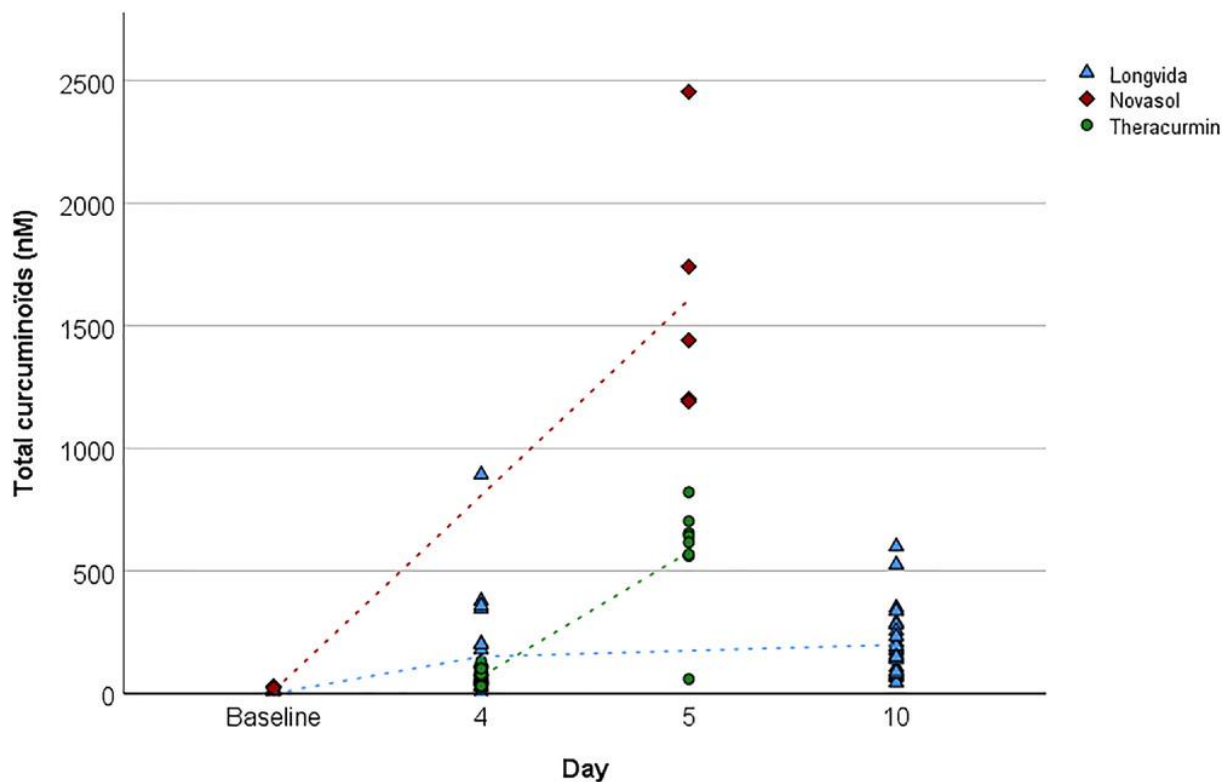

566

567 **Figure 3. Plasma levels of total curcuminoids after Longvida<sup>®</sup>, Theracurmin<sup>®</sup>**

568 **and Novasol<sup>®</sup> intake measured with HPLC-MS/MS**

569 Overview of plasma levels of total curcuminoids after Longvida<sup>®</sup>, Theracurmin<sup>®</sup> and

570 Novasol<sup>®</sup> intake. Curcumin, demethoxycurcumin, bisdemethoxycurcumin and

571 tetrahydrocurcumin as measured with HPLC-MS/MS after  $\beta$ -glucuronidase treatment,

572 summed as total curcuminoids in nanomolar (nM).

573

574 **Supplemental material**

575 **Supplemental table 1. Demographics for each individual participant**

| #  | Dx | Age | Sex | MMSE | CSF analysis |      |      |                | CSF assay | Amyloid-PET          | Curcumin    |
|----|----|-----|-----|------|--------------|------|------|----------------|-----------|----------------------|-------------|
|    |    |     |     |      | A $\beta$    | Tau  | pTau | pTau/A $\beta$ |           |                      |             |
| 1  | AD | 64  | M   | 20   | 778          | 551  | 60   | 0.077          | Elecsys   | n.a.                 | Longvida    |
| 2  | AD | 57  | M   | 23   | 342          | 108  | 10   | 0.029          | Elecsys   | n.a.                 | Longvida    |
| 3  | AD | 70  | F   | 30   | 511          | 211  | 21   | 0.041          | Elecsys   | n.a.                 | Longvida    |
| 4  | AD | 72  | M   | 22   | 805          | 316  | 35   | 0.043          | Elecsys   | n.a.                 | Longvida    |
| 5  | CN | 54  | F   | 30   | 641          | 208  | 19   | 0.030          | Elecsys   | (-) 18F-Florbetapir  | Longvida    |
| 6  | AD | 69  | M   | 24   | 322          | 340  | 34   | 0.106          | Elecsys   | n.a.                 | Longvida    |
| 7  | AD | 56  | F   | 21   | 746          | 215  | 23   | 0.031          | Elecsys   | n.a.                 | Longvida    |
| 8  | CN | 57  | M   | 28   | 1323         | 136  | 11   | 0.008          | Elecsys   | (-) 18F-Florbetapir  | Longvida    |
| 9  | AD | 59  | F   | 19   | 337          | 156  | 17   | 0.050          | Elecsys   | n.a.                 | Longvida    |
| 10 | CN | 89  | F   | 28   | n.a.         | n.a. | n.a. | n.a.           | n.a.      | (-) 18F-Flutemetamol | Longvida    |
| 11 | CN | 70  | F   | 29   | n.a.         | n.a. | n.a. | n.a.           | n.a.      | (-) 18F-Flutemetamol | Longvida    |
| 12 | AD | 75  | M   | 28   | n.a.         | n.a. | n.a. | n.a.           | n.a.      | (+) 18F-Florbetaben  | Longvida    |
| 13 | AD | 79  | M   | 27   | n.a.         | n.a. | n.a. | n.a.           | n.a.      | (+) 18F-Florbetaben  | Longvida    |
| 14 | AD | 81  | F   | 26   | n.a.         | n.a. | n.a. | n.a.           | n.a.      | (+) 18F-Florbetaben  | Longvida    |
| 15 | CN | 80  | M   | 29   | n.a.         | n.a. | n.a. | n.a.           | n.a.      | (-) 18F-Florbetapir  | Longvida    |
| 16 | AD | 77  | M   | 25   | n.a.         | n.a. | n.a. | n.a.           | n.a.      | (+) 18F-Flutemetamol | Longvida    |
| 17 | AD | 78  | M   | 27   | n.a.         | n.a. | n.a. | n.a.           | n.a.      | (+) 18F-Florbetaben  | Longvida    |
| 18 | AD | 81  | M   | 27   | n.a.         | n.a. | n.a. | n.a.           | n.a.      | (+) 18F-Florbetaben  | Longvida    |
| 19 | CN | 66  | F   | 29   | n.a.         | n.a. | n.a. | n.a.           | n.a.      | (-) 18F-Flutemetamol | Longvida    |
| 20 | CN | 82  | F   | 29   | n.a.         | n.a. | n.a. | n.a.           | n.a.      | (-) 18F-Flutemetamol | Longvida    |
| 21 | CN | 79  | M   | 30   | 1328         | 279  | 26   | 0.020          | Elecsys   | (-) 18F-Florbetapir  | Longvida    |
| 22 | CN | 78  | F   | 27   | n.a.         | n.a. | n.a. | n.a.           | n.a.      | (-) 18F-Flutemetamol | Longvida    |
| 23 | CN | 84  | M   | 29   | 1498         | 364  | 33   | 0.022          | Elecsys   | (-) 18F-Florbetapir  | Longvida    |
| 24 | AD | 77  | F   | 23   | 642          | 460  | 45   | 0.070          | Elecsys   | (+) 18F-Flutemetamol | Longvida    |
| 25 | CN | 66  | F   | 30   | n.a.         | n.a. | n.a. | n.a.           | n.a.      | (-) 18F-Flutemetamol | Longvida    |
| 26 | CN | 76  | F   | 29   | n.a.         | n.a. | n.a. | n.a.           | n.a.      | (-) 18F-Flutemetamol | Longvida    |
| 27 | AD | 67  | M   | 21   | 548          | 394  | 35   | 0.064          | Innotest  | (+) 18F-Florbetapir  | Theracurmin |
| 28 | AD | 61  | M   | 20   | 738          | 307  | 31   | 0.042          | Innotest  | (+) 18F-Florbetaben  | Theracurmin |
| 29 | CN | 63  | F   | 30   | n.a.         | n.a. | n.a. | n.a.           | n.a.      | (-) 18F-Florbetapir  | Theracurmin |
| 30 | AD | 64  | M   | 18   | 291          | 847  | 67   | 0.231          | Innotest  | (+) 18F-Florbetaben  | Theracurmin |
| 31 | AD | 66  | M   | 28   | 637          | 282  | 24   | 0.037          | Innotest  | (+) 18F-Florbetaben  | Theracurmin |
| 32 | CN | 51  | F   | 30   | 1604         | 110  | 7    | 0.004          | Innotest  | n.a.                 | Theracurmin |
| 33 | AD | 57  | F   | 19   | 843          | 587  | 48   | 0.057          | Innotest  | (+) 18F-Florbetaben  | Theracurmin |
| 34 | AD | 61  | M   | 25   | 456          | 367  | 40   | 0.088          | Innotest  | (+) 18F-Florbetaben  | Theracurmin |
| 35 | AD | 54  | M   | 24   | 521          | 322  | 30   | 0.058          | Innotest  | (+) 18F-Florbetaben  | Theracurmin |
| 36 | AD | 69  | M   | 25   | 693          | 318  | 35   | 0.051          | Innotest  | (+) 18F-Florbetaben  | Novasol     |
| 37 | AD | 65  | F   | 24   | 534          | 477  | 46   | 0.086          | Innotest  | (+) 18F-Florbetaben  | Novasol     |
| 38 | AD | 60  | M   | 18   | 497          | 232  | 23   | 0.047          | Innotest  | n.a.                 | Novasol     |
| 39 | AD | 56  | F   | 23   | 892          | 486  | 33   | 0.037          | Innotest  | n.a.                 | Novasol     |
| 40 | AD | 55  | F   | 24   | 525          | 270  | 25   | 0.048          | Innotest  | n.a.                 | Novasol     |

576  
577 Cohort characteristics of participants enrolled in cohort 1 (Longvida®), cohort 2

578 (Theracurmin®) and cohort 3 (Novasol®). CSF data is presented as pg/ml. pTau/A $\beta$   
579 ratio  $\geq 0.020$  was considered as AD profile.<sup>17</sup> Abbreviations: # = Participant Number,  
580 Dx =Diagnosis, MMSE = Mini-Mental State Examination, CSF = Cerebrospinal Fluid,  
581 A $\beta$  = Amyloid-beta, pTau = Phosphorylated Tau, + = positive, - = negative, n.a. = not  
582 available.

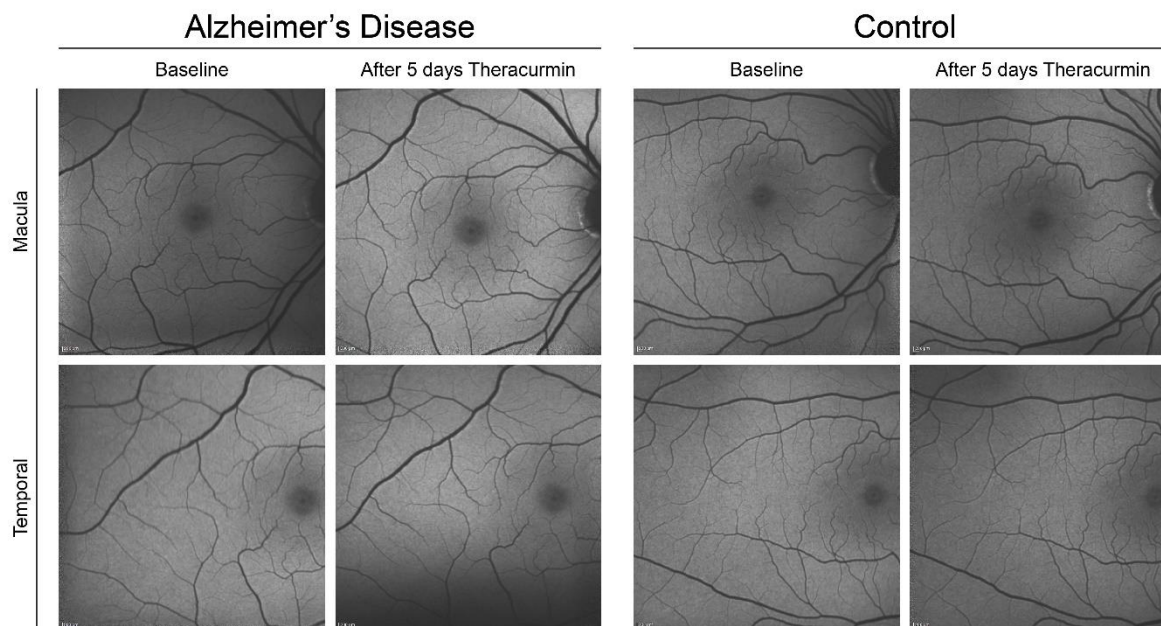

584

585 **Supplemental Figure 1. Pre- and post-curcumin retinal fluorescence images for**  
586 **AD patients and controls using Novasol®**

587 Pre-and post-curcumin retinal fluorescence images with a 55-degree lens using blue  
588 auto fluorescence ( $\lambda=486\text{nm}$ ) in 6 retinal regions in a representative Alzheimer's  
589 disease (AD) patient. Abbreviations: TS= temporal-superior, S= superior, T=  
590 temporal, M= macula, TI= temporal-inferior, I= inferior.

591

## Alzheimer's Disease

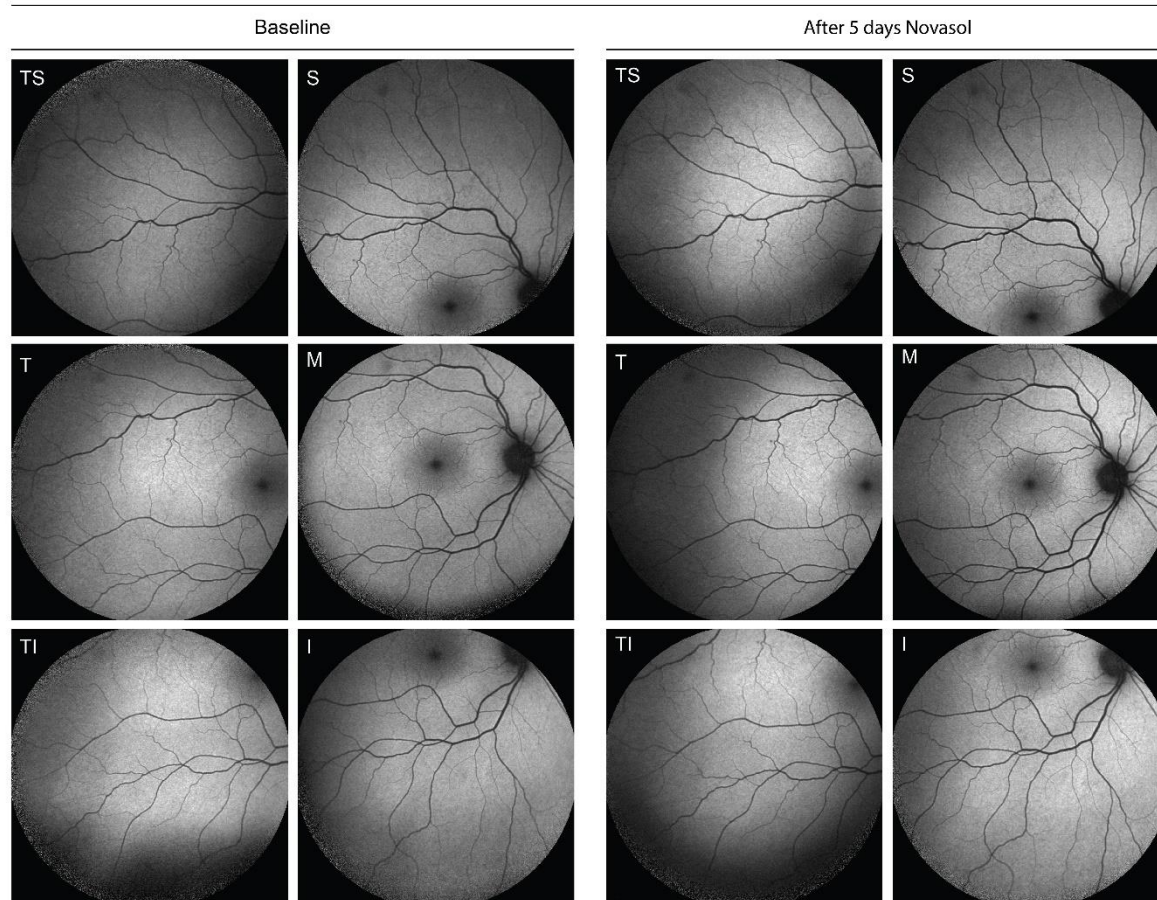

592

593 **Supplemental Figure 2. Pre- and post-curcumin retinal fluorescence images for AD**  
594 **patients and controls using Theracurmin®**

595 Pre-and post-curcumin retinal fluorescence images with a 30-degree lens using blue auto  
596 fluorescence ( $\lambda=486\text{nm}$ ) in 2 retinal regions in a representative Alzheimer's disease (AD)  
597 patient and control. Abbreviations: M= macula, T= temporal.

598
